# Supplementary material for: Functional dissection of PRC1 subunits RYBP and YAF2 during neural differentiation of embryonic stem cells
Source: PubMed Central journal article supplement (PMC10630410; doi:10.1038/s41467-023-42507-9), 2023-11-07
Supplement: 41467_2023_42507_MOESM1_ESM.pdf [file 41467_2023_42507_MOESM1_ESM.pdf]

## **Supplementary Information for**

### **Functional dissection of PRC1 subunits RYBP and YAF2 during neural differentiation of embryonic stem cells**

Yanjiang Liu<sup>†</sup>, Gongcheng Hu<sup>†</sup>, Shengxiong Yang, Mingze Yao, Zicong Liu, Chenghong Yan, Yulin Wen, Wangfang Ping, Juehan Wang, Yawei Song, Xiaotao Dong, Guangjin Pan, Hongjie Yao\*

† Contributed equally to this work.

\* Corresponding author.

#### **This PDF file includes:**

Supplementary Figures 1 to 5;

Supplementary Tables 1 to 8.

# Supplementary Figure 1

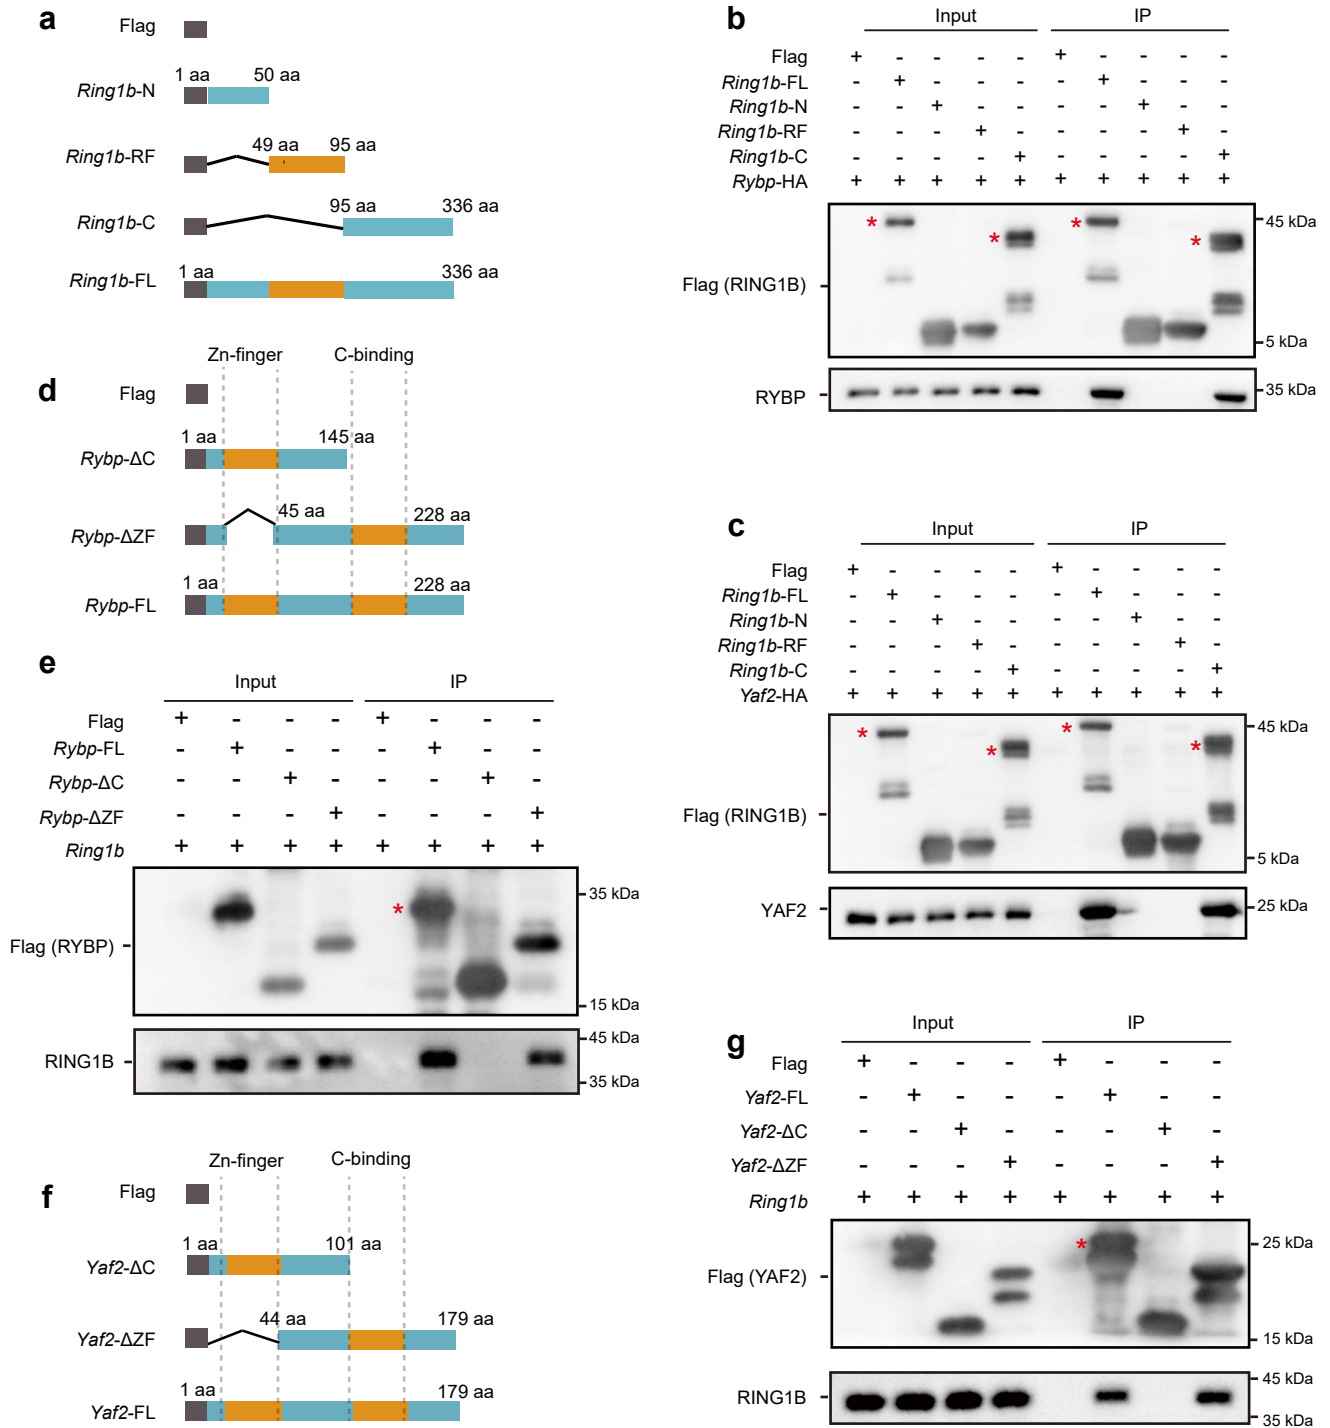

**Supplementary Figure 1. RYBP and YAF2 interact with RING1B at the C-terminus, respectively.** **a** Schematic representation of Flag-*Ring1b* and its deletions used in Flag co-IP assays. N: N-terminus; RF: ring finger region; C: C-terminus; FL: full length. **b** Flag immunoprecipitations to detect the interaction between RYBP and Flag-RING1B or Flag-tagged RING1B deletions. Asterisks indicate target proteins. **c** Flag immunoprecipitations to detect the interaction between YAF2 and Flag-RING1B or Flag-tagged RING1B deletions. Asterisks indicate target proteins. **d** Schematic representation of Flag-*Rybp* and its deletions used in Flag co-IP assays. ZF: zinc finger. **e** Detection of the interaction between RING1B and full-length RYBP or its deletions. Asterisks indicate target proteins. **f** Schematic representation of Flag-*Yaf2* and its deletions used in Flag co-IP assays. **g** Detection of the interaction between RING1B and full-length YAF2 or its deletions. Asterisks indicate target proteins. For **b**, **c**, **e** and **g**, representative immunoblots (n = 3 independent experiments) are shown. Source data are provided as a Source Data file.

# Supplementary Figure 2

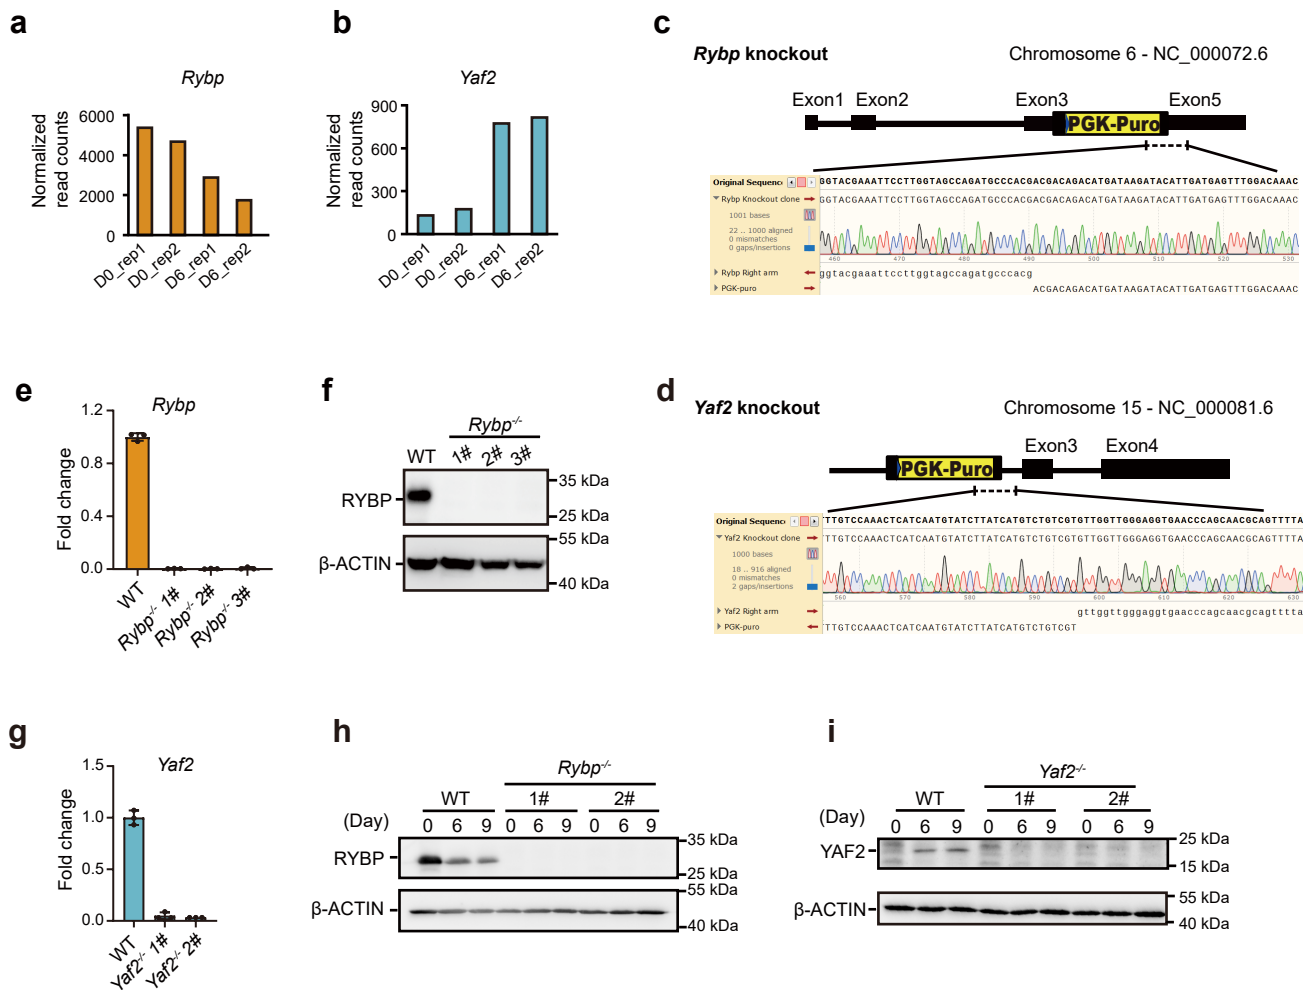

**Supplementary Figure 2. Expression of *Rybp* and *Yaf2* during mESC neural differentiation and generation of *Rybp*<sup>-/-</sup> or *Yaf2*<sup>-/-</sup> mESCs.** **a, b** Bar plots showing normalized read counts for *Rybp* (**a**) and *Yaf2* (**b**) expression during mESC neural differentiation from our previous RNA-seq data<sup>4</sup>. **c, d** Upper: Schematic overview depicting the targeting strategy for *Rybp* and *Yaf2* loci using CRISPR/Cas9. PGK: human phosphoglycerol kinase promoter; puro: puromycin resistance gene. Bottom: The insert for either *Rybp* knockout or *Yaf2* knockout was confirmed by Sanger sequencing. **e** RT-qPCR analysis of *Rybp* expression in both wild-type and *Rybp*<sup>-/-</sup> mESCs. The results are shown relative to wild-type (n=3 independent experiments). **f** Western blot analysis of RYBP expression in both wild-type and *Rybp*<sup>-/-</sup> mESCs. **g** RT-qPCR analysis of *Yaf2* expression in both wild-type and *Yaf2*<sup>-/-</sup> mESCs. The results are shown relative to wild-type (n=3 independent experiments). **h** Western blot analysis of RYBP expression in both wild-type and *Rybp*<sup>-/-</sup> mESCs and neural-differentiated cells. **i** Western blot analysis of YAF2 expression in both wild-type and *Yaf2*<sup>-/-</sup> mESCs and neural-differentiated cells. For **e** and **g**, data are represented as the mean values  $\pm$  s.d.s. Source data are provided as a Source Data file.

# Supplementary Figure 3

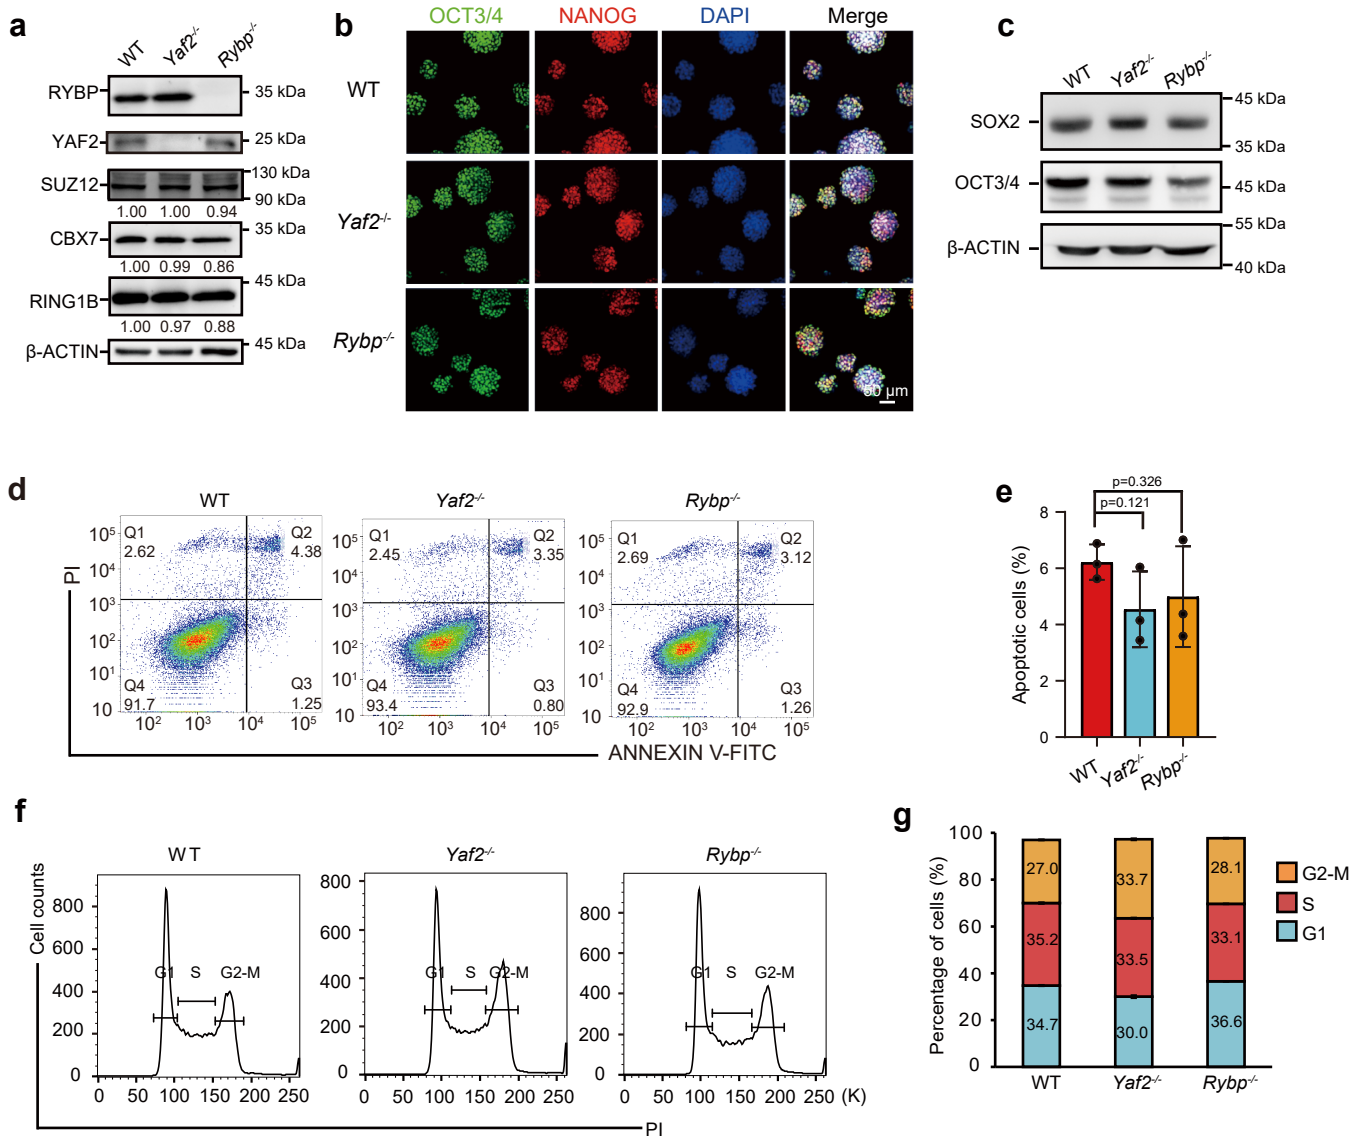

**Supplementary Figure 3. Effects of knocking out either *Rybp* or *Yaf2* on apoptosis and cell cycle.** **a** Western blot analysis of RYBP, YAF2, SUZ12, CBX7 and RING1B expression in wild-type, *Rybp*<sup>-/-</sup> and *Yaf2*<sup>-/-</sup> mESCs. **b** Immunofluorescence of OCT3/4 (green) and NANOG (red) in wild-type, *Rybp*<sup>-/-</sup> and *Yaf2*<sup>-/-</sup> mESCs. DNA was stained with DAPI (blue). Scale bar, 50 μm. **c** Western blot analysis of OCT3/4 and SOX2 expression in wild-type, *Rybp*<sup>-/-</sup> and *Yaf2*<sup>-/-</sup> mESCs. **d** FACS analysis of the percentage of apoptotic cells in wild-type, *Rybp*<sup>-/-</sup> and *Yaf2*<sup>-/-</sup> mESCs. Annexin V and PI were used to discriminate necrotic cells (Q1), late apoptotic cells (Q2), early apoptotic cells (Q3) and intact cells (Q4). **e** Statistical analysis of the total apoptotic cells, including early apoptotic cells and late apoptotic cells, in panel **(d)** (n=3 independent experiments). **f** FACS analysis of the cell cycle in wild-type, *Rybp*<sup>-/-</sup> and *Yaf2*<sup>-/-</sup> mESCs. **g** Statistical analysis of the cell cycle distribution in panel **(f)** (n=3 independent experiments). For **a-c**, representative immunoblots (n = 3 independent experiments) are shown. For **e**, data are represented as the mean values ± s.d.s with the indicated significance from two-sided *t* test. Source data are provided as a Source Data file.

# Supplementary Figure 4

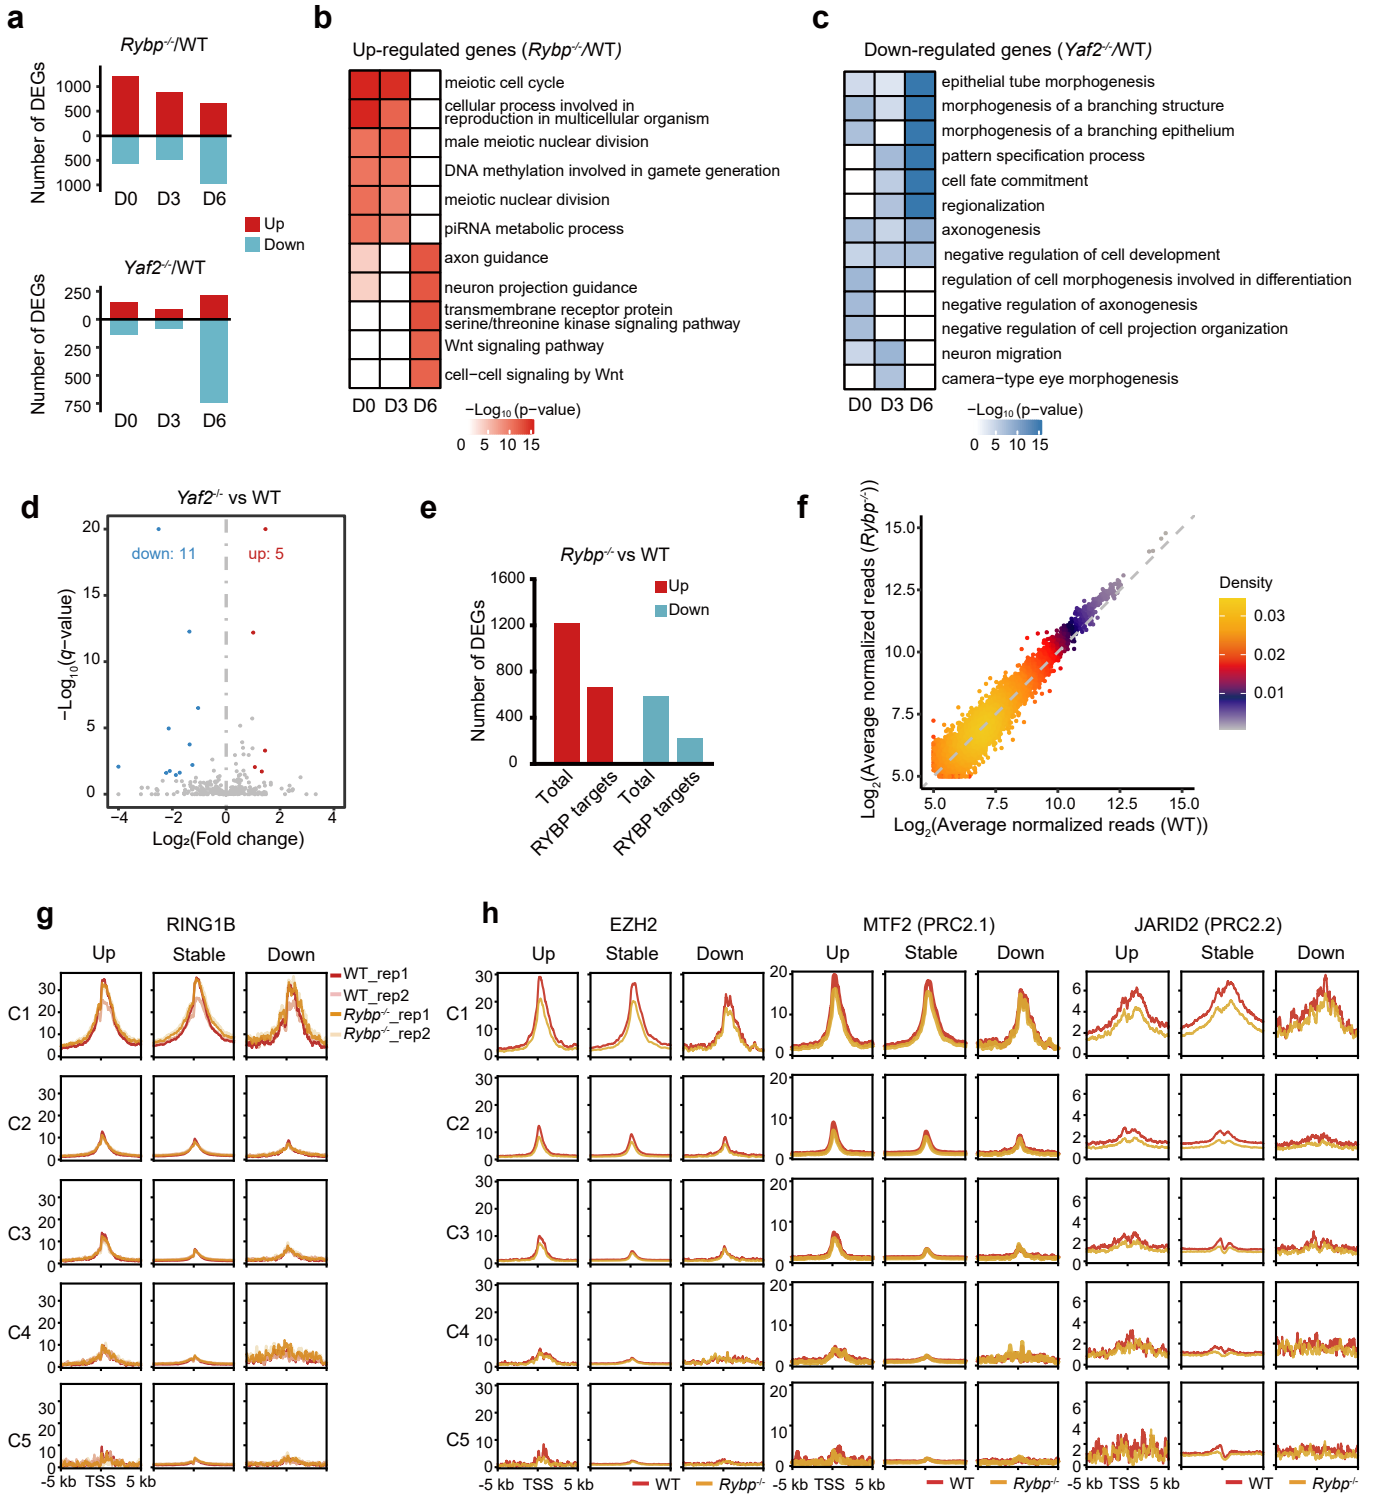



**Supplementary Figure 4. Effect of loss of either *Rybp* or *Yaf2* on gene expression and PRC2 binding.** **a** Bar plots showing the number of differentially expressed genes between *Rybp*<sup>-/-</sup> mESCs and wild-type mESCs (upper) or between *Yaf2*<sup>-/-</sup> mESCs and wild-type mESCs (bottom) during neural differentiation. **b** GO analysis of the biological functions of upregulated target genes in *Rybp*<sup>-/-</sup> mESCs relative to wild-type mESCs during neural differentiation. The results are expressed as -Log<sub>10</sub>(p value). **c** GO analysis of the biological functions of downregulated target genes in *Yaf2*<sup>-/-</sup> mESCs relative to wild-type mESCs during neural differentiation. The results are expressed as -Log<sub>10</sub>(p value). **d** Scatter plot showing changes in YAF2 target genes between wild-type and *Yaf2*<sup>-/-</sup> mESCs. **e** Bar plots showing the number of DEGs among RYBP target genes and total DEGs after *Rybp* knockout in mESCs. **f** Scatter plot showing the comparison of normalized RING1B ChIP signals in wild-type and *Rybp*<sup>-/-</sup> mESCs. **g** Average enrichment of RING1B around TSS regions for different RYBP target genes between wild-type and *Rybp*<sup>-/-</sup> mESCs from Fig. 2d. **h** Average enrichment of EZH2, MTF2 and JARID2 around TSS regions for different RYBP target genes between wild-type (red line) and *Rybp*<sup>-/-</sup> (orange line) mESCs from Fig. 2d. Source data are provided as a Source Data file.

# Supplementary Figure 5

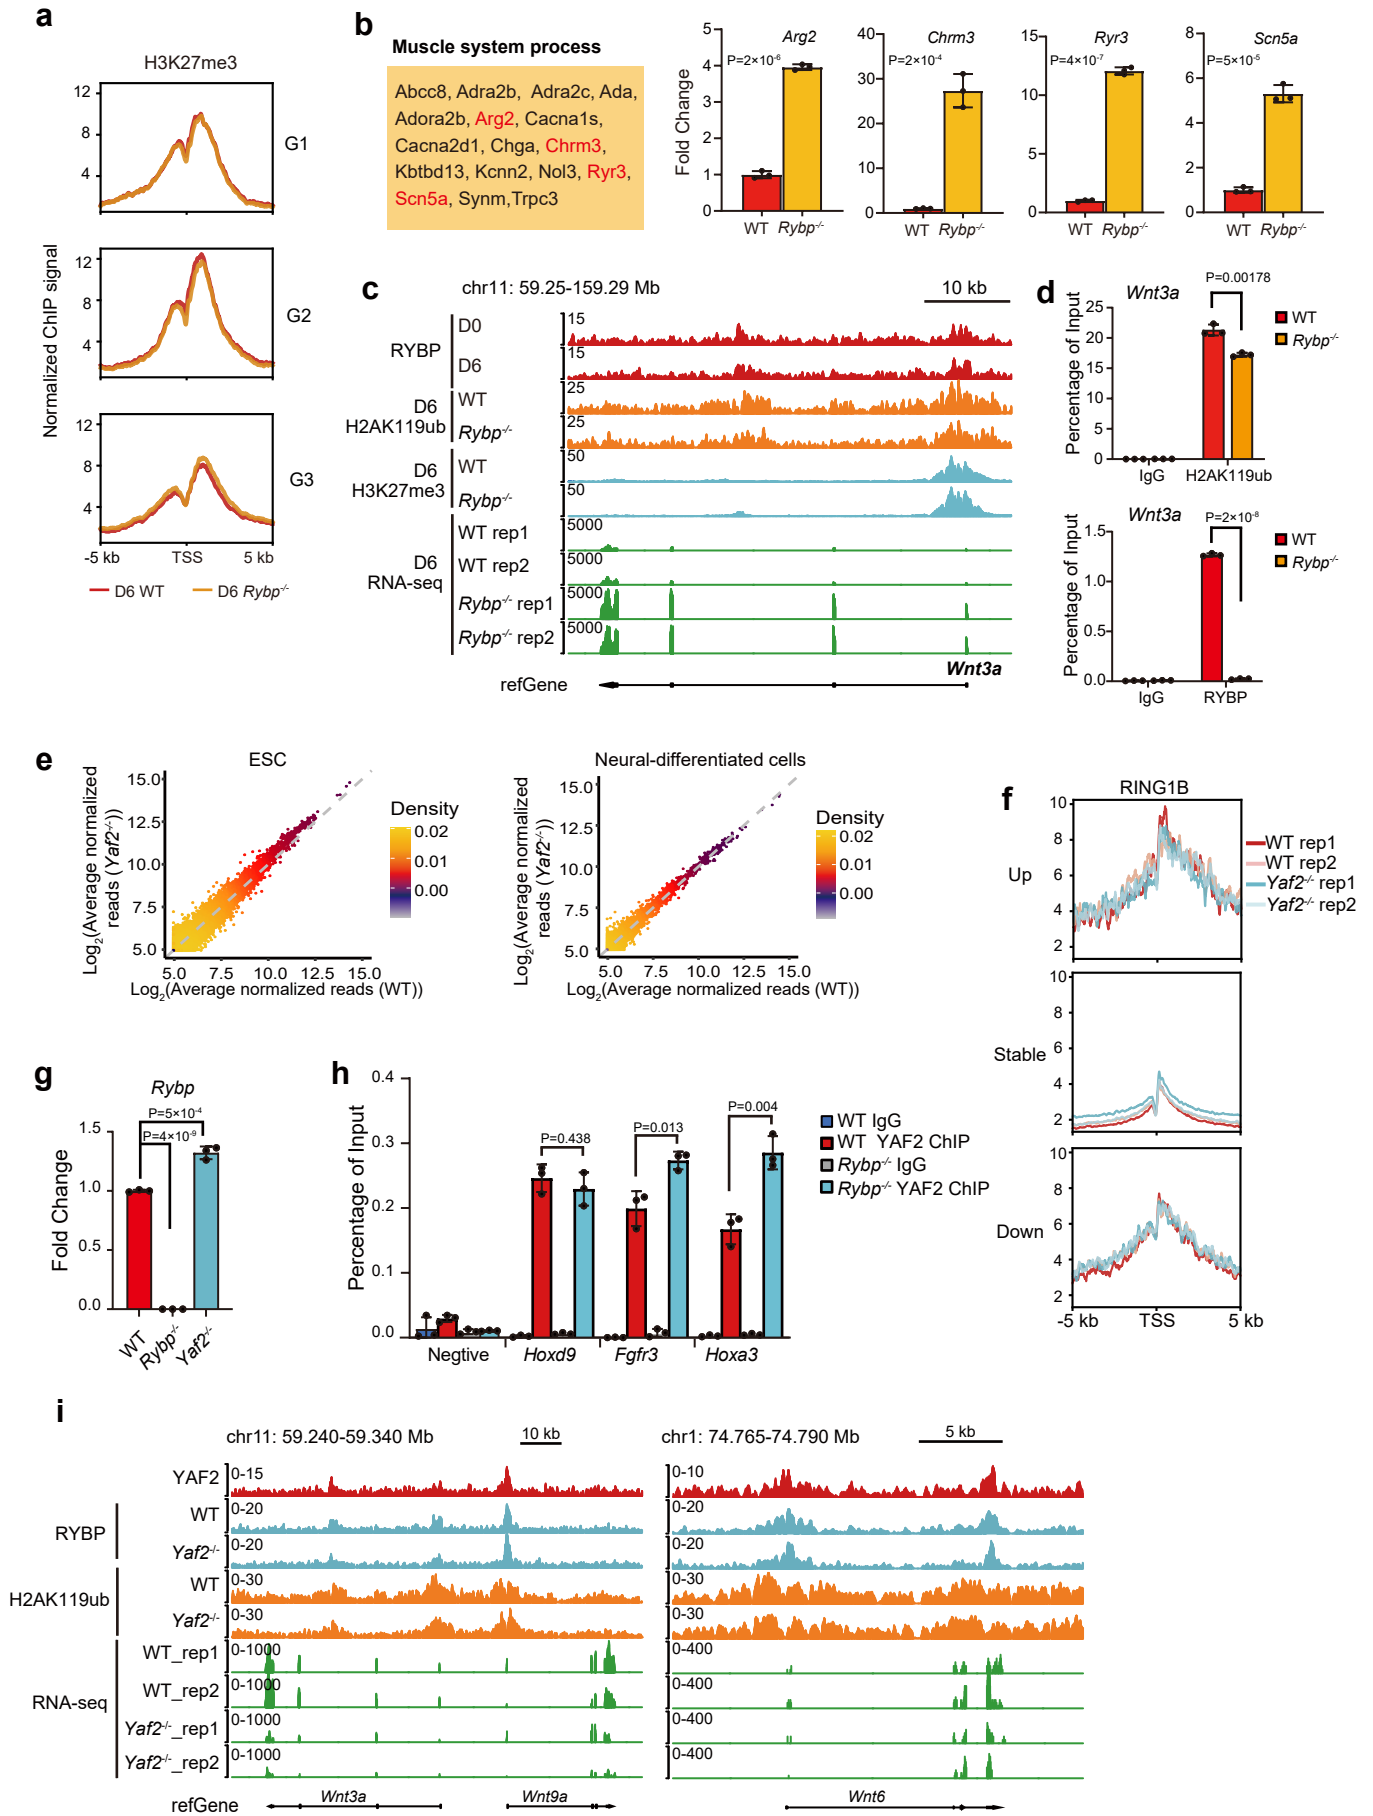

**Supplementary Figure 5. Analysis of the derepressed RYBP target genes after loss of either *Rybp* or *Yaf2*.** **a** Average enrichment of H3K27me3 in the promoters of different classes of genes between wild-type and *Rybp*<sup>-/-</sup> neural-differentiated cells on day 6 from Fig. 3c. **b** RT-qPCR analysis of the expression of muscle-related genes in wild-type and *Rybp*<sup>-/-</sup> neural differentiated cells on day 3 (n=3 independent experiments). **c** Representative genomic tracks showing the normalized signal for RYBP, H2AK119ub, H3K27me3 and RNA-seq data at the *Wnt3a* gene locus in neural-differentiated cells on day 6. **d** CHIP-qPCR showing relative enrichment of H2AK119ub and RYBP in the promoter region of *Wnt3a* in both wild-type and *Rybp*<sup>-/-</sup> neural-differentiated cells on day 6. IgG was used as the negative control. (n=3 independent experiments) **e** Scatter plots showing the comparison of normalized RING1B ChIP signals between wild-type and *Yaf2*<sup>-/-</sup> mESCs (left) and between wild-type and *Yaf2*<sup>-/-</sup> neural differentiated cells on day 6 (right). **f** Average normalized RING1B ChIP signal in the promoters of upregulated, stable and downregulated YAF2 target genes. **g** RT-qPCR analysis of the expression of *Rybp* in wild-type, *Rybp*<sup>-/-</sup> and *Yaf2*<sup>-/-</sup> neural differentiated cells on day 6 (n=3 independent experiments). **h** CHIP-qPCR showing the relative enrichment of YAF2 in the promoter regions of *Hoxd9*, *Fgfr3* and *Hoxa3* in both wild-type and *Rybp*<sup>-/-</sup> mESCs (n=3 independent experiments). **i** Genomic tracks showing YAF2, RYBP, H2AK119ub and RNA-seq at the *Wnt3a*, *Wnt9a* and *Wnt6* gene loci in wild-type and *Yaf2*<sup>-/-</sup> neural differentiated cells on day 6. For **b**, **d**, **g** and **h**, data are represented as the mean values ± s.d.s with the indicated significance from two-sided *t* test. Source data are provided as a Source Data file.

**Supplementary Table 1. Oligonucleotide information for PCR in this study.**

| Name                                       | Sequence (5'-3')                                                          |
|--------------------------------------------|---------------------------------------------------------------------------|
| pSin- <i>Ring1b</i> (FL-HA)-EcoR I -F      | acaaggatgacgacgataagATGTCTCAGGCTGTGCAGAC                                  |
| pSin- <i>Ring1b</i> (FL-HA)-EcoR I -R      | cgggccgctttctcgaggccTCAAGCGTAATCTGGAACATCGTATGGGTATTTGTGCTCCTTGGTGG       |
| pSin- <i>Ring1b</i> (FL no Flag)-F         | gtcgtgaggaattggccaccATGTCTCAGGCTGTGCAGAC                                  |
| pSin- <i>Ring1b</i> (FL no Flag)-R         | ggggccgctttctcgaggccTCATTTGTGCTCCTTGGTGG                                  |
| pSin-Flag- <i>Ring1b</i> (N)-F             | cgacgataaggaattcATGTCTCAGGCTGTGC                                          |
| pSin-Flag- <i>Ring1b</i> (N)-R             | tatggctagcgaattcTCACATTAATCACTGTGTAGACTTC                                 |
| pSin-Flag- <i>Ring1b</i> (RF)-F            | cgacgataaggaattcTTAATGTGCCCAATTT                                          |
| pSin-Flag- <i>Ring1b</i> (RF)-R            | tatggctagcgaattcTCAAACCAGTTTTTCCGACAGG                                    |
| pSin-Flag- <i>Ring1b</i> (C)-F             | cgacgataaggaattcGTTTCTAAAAGATCACTAAGGCC                                   |
| pSin-Flag- <i>Ring1b</i> (C)-R             | tatggctagcgaattcTCATTTGTGCTCCTTGGTGGG                                     |
| pSin- <i>Rybp</i> (FL)-EcoR I -F           | atgacgacgataaggaattcATGACCATGGGCGACAAGAA                                  |
| pSin- <i>Rybp</i> (FL)-EcoR I -R           | ctcatatggctagcgaattcTCAGAAAGATTTCATTCA                                    |
| pSin- <i>Rybp</i> ( $\Delta$ ZF)-EcoR I -F | atgacgacgataaggaattcGATGTGCGGAAAGGCACCTC                                  |
| pSin- <i>Rybp</i> ( $\Delta$ C)-EcoR I -R  | ctcatatggctagcgaattcCACCTTGAGGTGTGGTTTGT                                  |
| pSin- <i>Rybp</i> (FL-HA)-EcoR I -F        | gtcgtgaggaattggccaccATGACCATGGGCGACAAGAA                                  |
| pSin- <i>Rybp</i> (FL-HA)-EcoR I -R        | ggggccgctttctcgaggccTCAAGCGTAATCTGGAACATCGTATGGGTAgaaagattcatcattcactgctg |
| pSin- <i>Yaf2</i> (FL)-EcoR I -F           | atgacgacgataaggaattcATGGGCGACAAGAAGAGCCC                                  |
| pSin- <i>Yaf2</i> (FL)-EcoR I -R           | ctcatatggctagcgaattcTTAGTGAGACTCTCCGTTGAGGG                               |
| pSin- <i>Yaf2</i> ( $\Delta$ ZF)-EcoR I -F | atgacgacgataaggaattcGTGCGGAAGGGCACCTCCAC                                  |
| pSin- <i>Yaf2</i> ( $\Delta$ C)-EcoR I -R  | ctcatatggctagcgaattcTTAGGTTTTCTGTGACAGTTCT                                |
| pSin- <i>Yaf2</i> (FL-HA)-EcoR I -F        | gtcgtgaggaattggccaccATGGGCGACAAGAAGAGCCC                                  |
| pSin- <i>Yaf2</i> (FL-HA)-EcoR I -R        | ggggccgctttctcgaggccTCAAGCGTAATCTGGAACATCGTATGGGTAgtgagactctccgttgagg     |
| pET28a- <i>Yaf2</i> -mCherry-F             | tgggtcgggatccgaattcATGGGCGACAAGAAGAGCCC                                   |
| pET28a- <i>Yaf2</i> -mCherry-R             | cggatctcattgtttaaacgaTTACTTGTACAGCTCGTCCATGCCG                            |
| pGEX4T-GST- <i>Ring1b</i> -F               | atctggtccgctggatccATGTCTCAGGCTGTGCAGAC                                    |
| pGEX4T-GST- <i>Ring1b</i> -R               | ggcagatcgtcagtcagtcTCATTTGTGCTCCTTGGTGGGTG                                |

**Supplementary Table 2. sgRNA sequences used in this study.**

| <b>Name</b>                    | <b>sequence (5'-3')</b>   |
|--------------------------------|---------------------------|
| pX330- <i>Yaf2</i> -deletion-F | caccgTATCGCTTGTAGGATCGTAA |
| pX330- <i>Yaf2</i> -deletion-R | aaacTTACGATCCTACAAGCGATAc |
| pX330- <i>Rybp</i> -deletion-F | caccgTGTATGCTGTTAGCTTCACT |
| pX330- <i>Rybp</i> -deletion-R | aaacAGTGAAGCTAACAGCATACAc |

**supplementary Table 3. Antibody information and catalog number in this study.**

| REAGENT or RESOURCE                                                           | SOURCE                    | IDENTIFIER                        | Dilution                                      |
|-------------------------------------------------------------------------------|---------------------------|-----------------------------------|-----------------------------------------------|
| Rabbit polyclonal anti-RING1B                                                 | Abcam                     | Cat# ab101273, RRID:AB_10711495   | 1:1000 for WB                                 |
| Rabbit polyclonal anti-RING1B                                                 | CST                       | Cat#5694, RRID:AB_10705604        | 1:100 for ChIP                                |
| Rabbit polyclonal anti-RYBP                                                   | Millipore                 | Cat# AB3637, RRID:AB_11213333     | 1:1000 for WB, 1:100 for ChIP                 |
| Rabbit polyclonal anti-YAF2 (for WB)                                          | Bethyl Laboratories       | Cat# A303-654A, RRID:AB_11204594  | 1:1000 for WB                                 |
| Rabbit polyclonal anti-YAF2 (for ChIP)                                        | Our lab                   | NA                                | 1:100 for ChIP                                |
| Mouse monoclonal anti-FLAG                                                    | Sigma-Aldrich             | Cat# F1804, RRID:AB_262044        | 1:1000 for WB                                 |
| Rabbit polyclonal anti-HA tag                                                 | Abcam                     | Cat# ab9110, RRID:AB_307019       | 1:1000 for WB                                 |
| Mouse monoclonal anti- $\beta$ -ACTIN                                         | Sigma-Aldrich             | Cat# A2228, RRID:AB_476697        | 1:4000 for WB                                 |
| Rabbit polyclonal anti-TUBB3                                                  | Abcam                     | Cat# ab18207, RRID:AB_444319      | 1:1000 for WB                                 |
| Rabbit polyclonal anti-PAX6                                                   | Biolegend                 | Cat# 901301, RRID:AB_2565003      | 1:1000 for WB, 1:100 for flow cytometry stain |
| Mouse monoclonal anti-NESTIN                                                  | Cell Signaling Technology | Cat# 33475, RRID:AB_2799037       | 1:1000 for WB, 1:100 for flow cytometry stain |
| Mouse monoclonal anti- $\beta$ -Tubulin                                       | RayBiotech                | Cat# RM2003, RRID:AB_2773015      | 1:1000 for WB                                 |
| Rabbit polyclonal anti-Non-phospho (Active) $\beta$ -Catenin (Ser33/37/Thr41) | Cell Signaling Technology | Cat# 8814, RRID:AB_11127203       | 1:1000 for WB                                 |
| Rabbit monoclonal anti-H2AK119ub                                              | Cell Signaling Technology | Cat# 8240, RRID:AB_10891618       | 1:100 for ChIP                                |
| Rabbit monoclonal anti-H3K27me3                                               | Cell Signaling Technology | Cat# 9733, RRID:AB_2616029        | 1:100 for ChIP                                |
| Rabbit polyclonal anti-H3K27ac                                                | Active Motif              | Cat# 39133, RRID:AB_2561016       | 1:100 for ChIP                                |
| Mouse monoclonal anti-OCT3/4                                                  | Santa Cruz Biotechnology  | Cat# sc-5279, RRID:AB_628051      | 1:1000 for WB, 1:100 for IF                   |
| Rabbit polyclonal anti-NANOG                                                  | Novus                     | Cat# NB100-58842, RRID:AB_2150116 | 1:100 for IF                                  |
| Rabbit polyclonal anti-SUZ12                                                  | Active Motif              | Cat# 39357, RRID:AB_2614929       | 1:1000 for WB                                 |
| Rabbit polyclonal anti-CBX7                                                   | Abcam                     | Cat# ab21873, RRID:AB_726005      | 1:1000 for WB                                 |
| Rabbit monoclonal anti-SOX2                                                   | Cell Signaling Technology | Cat# 23064, RRID:AB_2714146       | 1:1000 for WB                                 |
| Rabbit monoclonal anti-EZH2                                                   | Cell Signaling Technology | Cat# 5246, RRID:AB_10694683       | 1:100 for ChIP                                |
| Rabbit polyclonal anti-MTF2                                                   | Proteintech               | Cat# 16208-1-AP, RRID:AB_2147370  | 1:100 for ChIP                                |
| Rabbit monoclonal anti-JARID2                                                 | Cell Signaling Technology | Cat# 13594, RRID:AB_2798269       | 1:100 for ChIP                                |
| Goat Anti-Mouse IgG (H+L) HRP secondary antibody                              | KangChen Bio-tech         | Cat# KC-MM-035                    | 1:5000 for WB                                 |
| Goat Anti-Rabbit IgG (H+L) HRP secondary antibody                             | KangChen Bio-tech         | Cat# KC-RB-035                    | 1:5000 for WB                                 |
| Goat anti-mouse IgG Alexa 594 secondary antibody                              | Invitrogen                | Cat# A11032, RRID:AB_2534091      | 1:500 for flow cytometry stain                |
| Goat anti-rabbit IgG Alexa 647 secondary antibody                             | Invitrogen                | Cat# A21245, RRID:AB_141775       | 1:500 for flow cytometry stain                |

**Supplementary Table 4. Primer sequences used for RT-qPCR in this study.**

| <b>Name</b>   | <b>Foward Primer (5'-3')</b> | <b>Reverse Primer (5'-3')</b> |
|---------------|------------------------------|-------------------------------|
| <i>Gapdh</i>  | AACTTTGGCATTGTGGAAGGGCTCA    | TTGGCAGCACCCAGTGGATGCAGGGA    |
| <i>Arg2</i>   | TCCTCCACGGGCAAATTCC          | GCTGGACCATATTCCACTCCTA        |
| <i>Chrm3</i>  | CCTCGCCTTTGTTTCCCAAC         | TTGAGGAGAAATTCCCAGAGGT        |
| <i>Ryr3</i>   | CTGAGCTGGTCCACTTTGTA         | GAGGTCACCTAATCCCCTTCA         |
| <i>Scn5a</i>  | ATGGCAAACCTCCTGTTACCTC       | CCACGGGCTTGTTTTTCAGC          |
| <i>Pax6</i>   | GCAGATGCAAAAGTCCAGGTG        | CAGGTTGCGAAGAACTCTGTTT        |
| <i>Tubb3</i>  | ACTTGGAACCTGGAACCATGG        | GGCCTGAATAGGTGTCCAAAGG        |
| <i>Map2</i>   | GCCAGCCTCAGAACAAACAG         | AAGGCTTGGGAGGGAAGAAC          |
| <i>Nestin</i> | CCCTGAAGTCGAGGAGCTG          | CTGCTGCACCTCTAAGCGA           |
| <i>Sox1</i>   | GCACACAGCGTTTTCTCGG          | ACATCCGACTCCTCTTCCC           |
| <i>Yaf2</i>   | CCCTGGGGAAAAAGTATCGCT        | CCTGACCCTTTCGGGACATC          |
| <i>Rybp</i>   | CAACGTCACCGTCATTATCACAG      | CATCATTCACTGCTGACATGTCG       |
| <i>Wnt3a</i>  | AATTTGGAGGAATGGTCTCTCGG      | CAGCAGGTCTTCACTTCACAG         |
| <i>Wnt6</i>   | GCAAGACTGGGGGTTTCGAG         | CCTGACAACCACACTGTAGGAG        |
| <i>Wnt9a</i>  | GGCCCAAGCACACTACAAG          | AGAAGAGATGGCGTAGAGGAAA        |

**Supplementary Table 5. Primer sequences used for ChIP-qPCR in this study.**

| <b>Name</b>     | <b>Sequence (5'-3')</b> |
|-----------------|-------------------------|
| <i>Wnt3a</i> -F | GGTGACCTTAAGTCTGCGCT    |
| <i>Wnt3a</i> -R | TCTCAGGCCCTAAGTCCTCC    |
| <i>Wnt6</i> -F  | AGAGAGAGTCAAACGGCTGC    |
| <i>Wnt6</i> -R  | TACTGCCAATGCTGAAGGGG    |
| <i>Hoxa3</i> -F | TGCCCTAACAGTTTGGCGTC    |
| <i>Hoxa3</i> -R | GCAGCCTGGTCCTAACGTG     |
| <i>Hoxd9</i> -F | AAAAGGACTGAGTGCTCCGC    |
| <i>Hoxd9</i> -R | GGAACGAGTTGCACGGGAAT    |
| <i>Fgfr3</i> -F | TTTAGCGCCTGCTAGGACTG    |
| <i>Fgfr3</i> -R | GACACCCGACGCAAGAAGTA    |
| Negative ctrl-F | CTTCTCACGGCCCCAATCAT    |
| Negative ctrl-R | CATCCCTGTAGCGACCCATC    |



**Supplementary Table 6. Mapping statistic and peak calling information for ChIP-seq data.**

| IP          | Treatment                  | Cells                                | Total reads | Mappin<br>g ratio | Unique<br>reads | Unique reads<br>(subsample) | Control<br>reads | Number<br>of peaks |
|-------------|----------------------------|--------------------------------------|-------------|-------------------|-----------------|-----------------------------|------------------|--------------------|
| RYBP        | Wild-type                  | mESCs                                | 46610491    | 97.73             | 26420512        | —                           | 27473567         | 10191              |
| YAF2        | Wild-type                  | mESCs                                | 47948159    | 97.92             | 25667850        | —                           | 21668926         | 504                |
| RYBP        | Wild-type                  | neural differentiated cells on day 6 | 46890923    | 97.74             | 29032555        | —                           | 20930723         | 6991               |
| YAF2        | Wild-type                  | neural differentiated cells on day 6 | 39512031    | 97.62             | 25455192        | —                           | 20930723         | 6733               |
| RYBP        | <i>Yaf2</i> <sup>-/-</sup> | neural differentiated cells on day 6 | 40420126    | 97.23             | 25249341        | —                           | 22208382         | 9742               |
| YAF2        | <i>Rybp</i> <sup>-/-</sup> | neural differentiated cells on day 6 | 38118491    | 97.8              | 24101282        | —                           | 24090025         | 9020               |
| H2AK119ub   | Wild-type                  | mESCs                                | 49895173    | 41.44             | 14179265        | 14179265                    | 24836635         | 23152              |
| H2AK119ub   | <i>Rybp</i> <sup>-/-</sup> | mESCs                                | 29276653    | 83.19             | 16660210        | 16660210                    | 27473567         | 6510               |
| H2AK119ub   | <i>Yaf2</i> <sup>-/-</sup> | mESCs                                | 51420275    | 80.33             | 29682587        | 14984156                    | 21668926         | 17164              |
| H2AK119ub   | Wild-type                  | neural differentiated cells on day 6 | 34442358    | 88.99             | 24625869        | 14985097                    | 20930723         | 34029              |
| H2AK119ub   | <i>Rybp</i> <sup>-/-</sup> | neural differentiated cells on day 6 | 29067210    | 86.07             | 20078291        | 14984753                    | 24090025         | 39849              |
| H2AK119ub   | <i>Yaf2</i> <sup>-/-</sup> | neural differentiated cells on day 6 | 33948990    | 85.42             | 23531078        | 14983559                    | 22208382         | 41678              |
| H3K27me3    | Wild-type                  | mESCs                                | 36791122    | 92.76             | 23701592        | —                           | 24836635         | 68776              |
| H3K27me3    | <i>Rybp</i> <sup>-/-</sup> | mESCs                                | 32308684    | 94.08             | 20847570        | —                           | 27473567         | 70771              |
| H3K27me3    | <i>Yaf2</i> <sup>-/-</sup> | mESCs                                | 30648343    | 93.45             | 19804866        | —                           | 21668926         | 65625              |
| H3K27me3    | Wild-type                  | neural differentiated cells on day 6 | 29054469    | 84.57             | 17516424        | —                           | 20930723         | 17106              |
| H3K27me3    | <i>Rybp</i> <sup>-/-</sup> | neural differentiated cells on day 6 | 40306905    | 87.4              | 24413112        | —                           | 24090025         | 18139              |
| H3K27me3    | <i>Yaf2</i> <sup>-/-</sup> | neural differentiated cells on day 6 | 29746850    | 85.35             | 17781997        | —                           | 22208382         | 16140              |
| EZH2        | Wild-type                  | mESCs                                | 37154383    | 90.31             | 17685477        | —                           | 24836635         | 10403              |
| EZH2        | <i>Rybp</i> <sup>-/-</sup> | mESCs                                | 51726087    | 91.12             | 22917974        | —                           | 27473567         | 6261               |
| EZH2        | <i>Yaf2</i> <sup>-/-</sup> | mESCs                                | 44744908    | 90.45             | 21079457        | —                           | 21668926         | 8293               |
| MTF2        | Wild-type                  | mESCs                                | 35083775    | 90.07             | 17421943        | —                           | 24836635         | 5258               |
| MTF2        | <i>Rybp</i> <sup>-/-</sup> | mESCs                                | 55362595    | 89.79             | 24695369        | —                           | 27473567         | 6386               |
| MTF2        | <i>Yaf2</i> <sup>-/-</sup> | mESCs                                | 53795477    | 89.69             | 24616676        | —                           | 21668926         | 6264               |
| JARID2      | Wild-type                  | mESCs                                | 30333656    | 80.08             | 13623305        | —                           | 24836635         | 2833               |
| JARID2      | <i>Rybp</i> <sup>-/-</sup> | mESCs                                | 35353350    | 65.33             | 11911870        | —                           | 27473567         | 2615               |
| JARID2      | <i>Yaf2</i> <sup>-/-</sup> | mESCs                                | 36593547    | 89.36             | 20491309        | —                           | 21668926         | 4995               |
| H3K27ac     | Wild-type                  | mESCs                                | 40832081    | 94.3              | 21452788        | —                           | 24836635         | 33998              |
| H3K27ac     | <i>Rybp</i> <sup>-/-</sup> | mESCs                                | 42250404    | 93.78             | 21132180        | —                           | 27473567         | 31015              |
| RING1B_rep1 | Wild-type                  | mESCs                                | 38203769    | 86.2              | 17190604        | 10000000                    | 24836635         | 12282              |
| RING1B_rep2 | Wild-type                  | mESCs                                | 31620588    | 81.3              | 12939006        | 10000000                    | 24836635         | 10104              |
| RING1B_rep1 | <i>Rybp</i> <sup>-/-</sup> | mESCs                                | 47161455    | 85.9              | 20465203        | 10000000                    | 27473567         | 12349              |
| RING1B_rep2 | <i>Rybp</i> <sup>-/-</sup> | mESCs                                | 27849080    | 80.7              | 11402658        | 10000000                    | 27473567         | 7900               |
| RING1B_rep1 | <i>Yaf2</i> <sup>-/-</sup> | mESCs                                | 38946166    | 87                | 18129307        | 10000000                    | 21668926         | 11181              |
| RING1B_rep2 | <i>Yaf2</i> <sup>-/-</sup> | mESCs                                | 29074955    | 80.3              | 11395642        | 10000000                    | 21668926         | 6735               |
| RING1B_rep1 | Wild-type                  | neural differentiated cells on day 6 | 42970425    | 86.6              | 19518458        | 10000000                    | 20930723         | 6453               |
| RING1B_rep2 | Wild-type                  | neural differentiated cells on day 6 | 27827564    | 81.2              | 11452011        | 10000000                    | 20930723         | 3945               |
| RING1B_rep1 | <i>Rybp</i> <sup>-/-</sup> | neural differentiated cells on day 6 | 38115125    | 85.2              | 17092121        | 10000000                    | 24090025         | 7793               |
| RING1B_rep2 | <i>Rybp</i> <sup>-/-</sup> | neural differentiated cells on day 6 | 30223096    | 79.9              | 11591762        | 10000000                    | 24090025         | 4619               |
| RING1B_rep1 | <i>Yaf2</i> <sup>-/-</sup> | neural differentiated cells on day 6 | 38730079    | 86                | 17578510        | 10000000                    | 22208382         | 3760               |
| RING1B_rep2 | <i>Yaf2</i> <sup>-/-</sup> | neural differentiated cells on day 6 | 30831114    | 79.6              | 11860033        | 10000000                    | 22208382         | 3477               |

**Supplementary Table 7. Normalization information for calibrated ChIP-seq data.**

| IP                  | Treatment                  | Cells                                | Reads mapped to mm10 | Reads mapped to dm6 | dm6/mm10   | Scale factor |
|---------------------|----------------------------|--------------------------------------|----------------------|---------------------|------------|--------------|
| H2AK119ub           | Wild-type                  | mESCs                                | 14160715             | 14682               | 0.00103681 | 1            |
| H2AK119ub           | <i>Rybp</i> <sup>-/-</sup> | mESCs                                | 16645528             | 18550               | 0.00111441 | 0.930365718  |
| H2AK119ub_subsample | <i>Yaf2</i> <sup>-/-</sup> | mESCs                                | 14984157             | 15843               | 0.00105732 | 0.980606867  |
| H2AK119ub_subsample | Wild-type                  | neural differentiated cells on day 6 | 14985097             | 14903               | 0.00099452 | 1.042523599  |
| H2AK119ub_subsample | <i>Rybp</i> <sup>-/-</sup> | neural differentiated cells on day 6 | 14984753             | 15247               | 0.0010175  | 1.018978982  |
| H2AK119ub_subsample | <i>Yaf2</i> <sup>-/-</sup> | neural differentiated cells on day 6 | 14983559             | 16441               | 0.00109727 | 0.944902048  |
| H3K27me3            | Wild-type                  | mESCs                                | 23701592             | 24848               | 0.00104837 | 1            |
| H3K27me3            | <i>Rybp</i> <sup>-/-</sup> | mESCs                                | 20847570             | 20270               | 0.0009723  | 1.078240431  |
| H3K27me3            | <i>Yaf2</i> <sup>-/-</sup> | mESCs                                | 19804866             | 22152               | 0.00111851 | 0.937287631  |
| H3K27me3            | Wild-type                  | neural differentiated cells on day 6 | 17516424             | 88591               | 0.0050576  | 0.207285902  |
| H3K27me3            | <i>Rybp</i> <sup>-/-</sup> | neural differentiated cells on day 6 | 24413112             | 129641              | 0.0053103  | 0.197421611  |
| H3K27me3            | <i>Yaf2</i> <sup>-/-</sup> | neural differentiated cells on day 6 | 17781997             | 85738               | 0.00482162 | 0.21743082   |

  

| IP     | Treatment                  | Cells | Reads mapped to mm10 | Reads mapped to hg38 | hg38/mm10  | Scale factor |
|--------|----------------------------|-------|----------------------|----------------------|------------|--------------|
| EZH2   | Wild-type                  | mESCs | 35370954             | 2355352              | 0.06659    | 1            |
| EZH2   | <i>Rybp</i> <sup>-/-</sup> | mESCs | 45835948             | 4101678              | 0.08948605 | 0.744138375  |
| EZH2   | <i>Yaf2</i> <sup>-/-</sup> | mESCs | 42158914             | 3321154              | 0.07877703 | 0.845297234  |
| MTF2   | Wild-type                  | mESCs | 34843886             | 2519624              | 0.0723118  | 1            |
| MTF2   | <i>Rybp</i> <sup>-/-</sup> | mESCs | 49390738             | 4611920              | 0.09337621 | 0.713136716  |
| MTF2   | <i>Yaf2</i> <sup>-/-</sup> | mESCs | 49233352             | 5723928              | 0.11626119 | 0.572762123  |
| JARID2 | Wild-type                  | mESCs | 27246610             | 1295582              | 0.04755021 | 1            |
| JARID2 | <i>Rybp</i> <sup>-/-</sup> | mESCs | 23823740             | 1580470              | 0.06634013 | 0.716763884  |
| JARID2 | <i>Yaf2</i> <sup>-/-</sup> | mESCs | 40982618             | 2384156              | 0.05817481 | 0.817367677  |

**Supplementary Table 8. Mapping statistic and peak calling information for ATAC-seq data.**

| Sample      | Treatment                  | Cells | Total reads | Mapping ratio | Unique reads | Number of peaks |
|-------------|----------------------------|-------|-------------|---------------|--------------|-----------------|
| Replicate 1 | Wild-type                  | mESCs | 30790196    | 97.59         | 17090337     | 49139           |
| Replicate 2 | Wild-type                  | mESCs | 30527311    | 97.52         | 17533725     | 46610           |
| Replicate 1 | <i>Rybp</i> <sup>-/-</sup> | mESCs | 36677783    | 97.46         | 19305413     | 61943           |
| Replicate 2 | <i>Rybp</i> <sup>-/-</sup> | mESCs | 33560589    | 97.29         | 19305055     | 55007           |
